# Supplementary material for: Photo-initiated solvent-mediated depolymerization of consumer poly(methyl methacrylate) without chlorinated reagents
Source: Springer Nature journal article supplement (doi:10.1038/s41467-025-67997-7), 2026-01-28
Supplement: MOESM1 [file 41467_2025_67997_MOESM1_ESM.pdf]

# Supplementary Information

## Photo-initiated solvent-mediated depolymerization of consumer poly(methyl methacrylate) without chlorinated reagents

**Authors:** Jonathan T. Husband,<sup>\*1,2</sup> Gavin Irvine,<sup>1,2</sup> Callum R. Morris,<sup>3</sup> Andrea Folli,<sup>3,4</sup> Matthew G. Davidson,<sup>\*1,2</sup> Simon J. Freakley<sup>\*1,2</sup>

### Affiliations:

<sup>1</sup> Bath Institute of Sustainability and Climate Change, East Building, Claverton Down, Bath, BA2 7AY.

<sup>2</sup> Department of Chemistry, University of Bath, Claverton Down, Bath BA2 7AY, U.K.

<sup>3</sup> Cardiff Catalysis Institute, School of Chemistry, Cardiff University, Translational Research Hub, Maindy Road, Cardiff, CF24 4HQ, United Kingdom

<sup>4</sup> Net Zero Innovation Institute, Cardiff University, Translational Research Hub, Maindy Road, Cardiff, CF24 4HQ, United Kingdom

\*Corresponding authors. Jonathan T. Husband: [jth67@bath.ac.uk](mailto:jth67@bath.ac.uk); Matthew G. Davidson: [M.G.Davidson@bath.ac.uk](mailto:M.G.Davidson@bath.ac.uk); Simon J. Freakley: [sf756@bath.ac.uk](mailto:sf756@bath.ac.uk).

### Depolymerizations

#### PMMA depolymerization general set-up

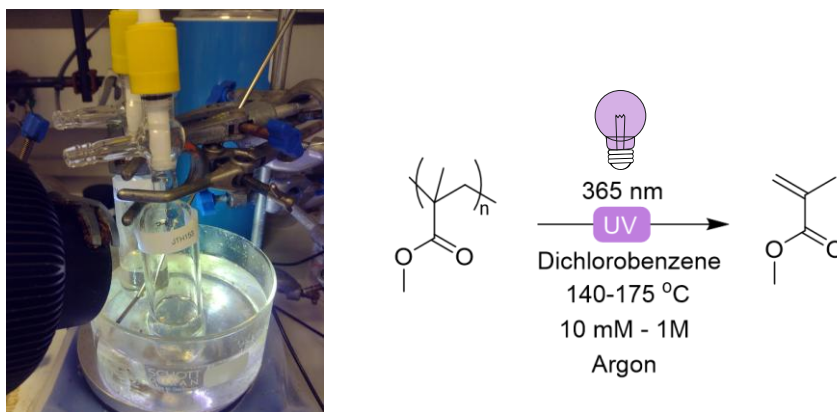

**Figure S1: PMMA depolymerization set-up.** Photograph of the general depolymerization set-up (left) and general scheme (right).

#### Lamp power

To study the effect of lamp distance on conversion the depolymerizations were undertaken at 140 °C, with the lamp at 2 cm and 6 cm. To estimate lamp output the emission of the lamp was measured by UV-A meter at various lamp distances (Figure S2). The detector had a limit of 40 mW/cm<sup>2</sup>, so the relationship was extrapolated to distances < 10 cm. At a lamp distance of 2 cm (≈ 100 mW/cm<sup>2</sup>), conversion was measured at 16 %, whereas at a lamp distance of 6 cm (≈ 60 mW/cm<sup>2</sup>), conversion was measured at 12 %.

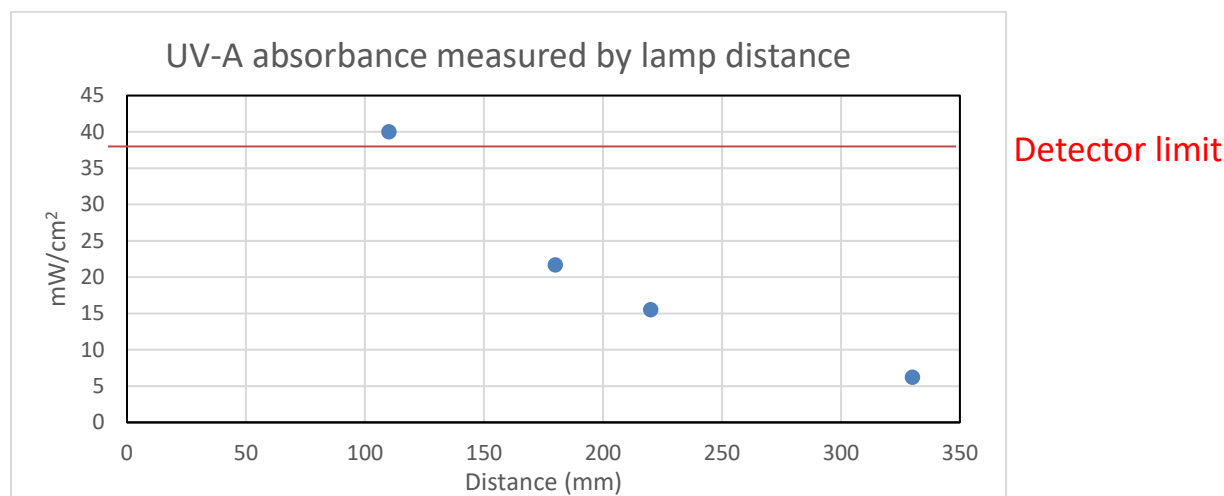

**Figure S2: Study on lamp power.** UV-A absorbance measured at distances from the UV lamp.

### Analysis of depolymerization conversion

For monitoring, samples were run with approximately 50:50 NMR solvent to crude reaction solution. Acetone- $d_6$  was found to help resolve the PMMA methyl from monomer methyl. For low conversion samples the vinyl protons on the monomer could be integrated against total OMe integration/3: *Equation (3):*  $Conv(\%) = \frac{\int H_{Vinyl}}{(\int H_{OMe}/3)} * 100$ . For samples that reach higher conversion, the OMe for Monomer and OMe for Polymer can be differentiated and the following calculation can also be used: *Equation (4):*  $Conv(\%) = \frac{\int H_{OMe\ monomer}}{(\int H_{OMe\ polymer})} * 100$ . Both methods gave relative errors within  $\pm 5\%$  even with a slight overlap of peaks, therefore all reported values are with equation (1). In addition, polymer OMe protons ( $\sim 3.4$  ppm) can be compared to polymer  $CH_2-CH_3$  regions at 0.7 – 1.2 ppm, and all samples maintained the ratio 1:1 indicating the integrity of PMMA architecture.

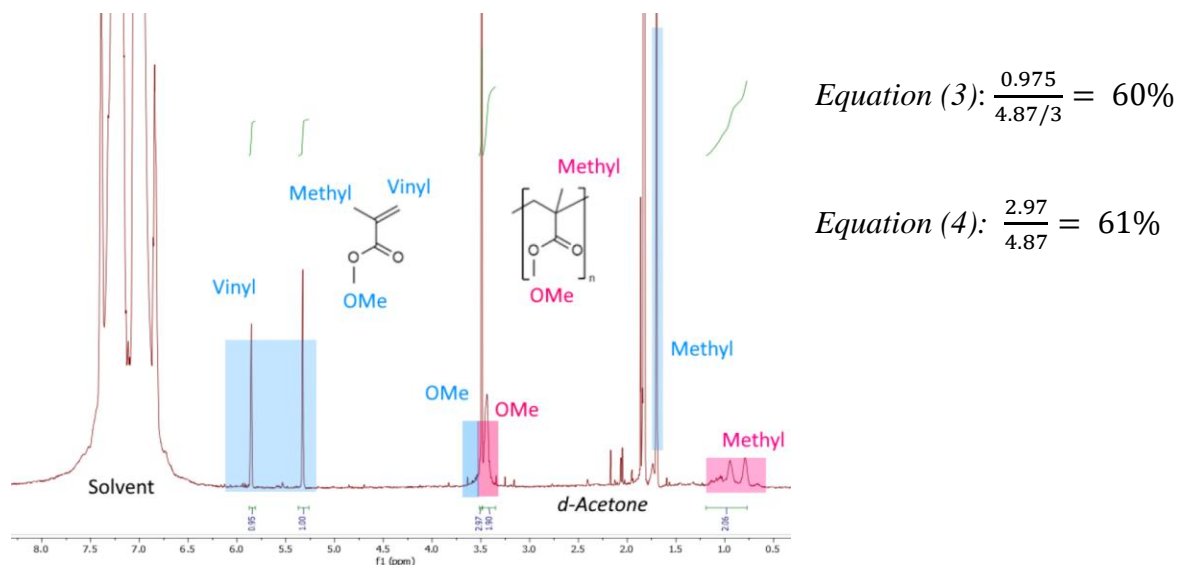

**Figure S3: Example  $^1H$  NMR interpretation.**  $^1H$  NMR ( $d_6$ -acetone) regions used for integration in a reaction that reached high conversion (blue attributed to monomer, pink attributed to polymer), showing good agreement between equations (3) and (4) for integration.

## Distillation of rMMA

To recycle MMA, the crude reaction solution in dichlorobenzene was heated to around 180°C in a short path distillation set-up (Figure S4) for about 4 hours. MMA was collected in a round bottom flask, 84% of MMA was recovered from the crude NMR conversion; while some monomer remained in the distillation set-up. The distilled MMA solution (2.7 mL) was 73 mol% MMA (1.84 g) with the remainder being co-evaporated dichlorobenzene (0.96 g).

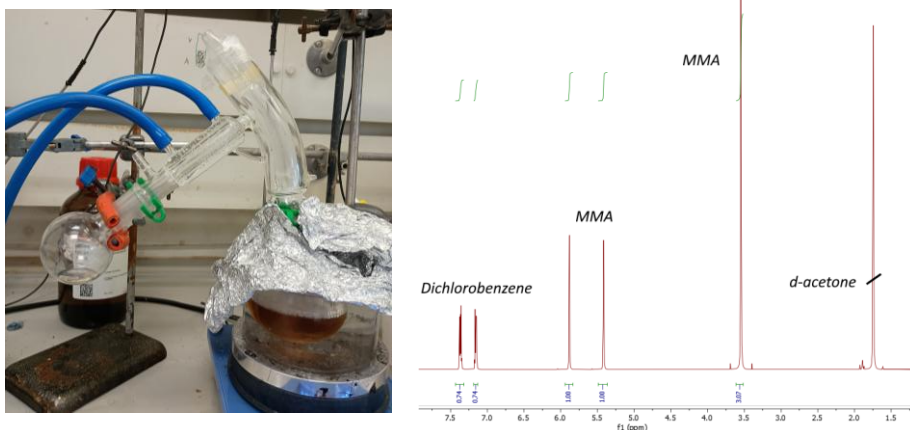

**Figure S4: Distillation of rMMA** Left: Photo of rMMA distillation set-up. Right: <sup>1</sup>H NMR (*d*<sub>6</sub>-acetone) spectra of rMMA distillate.

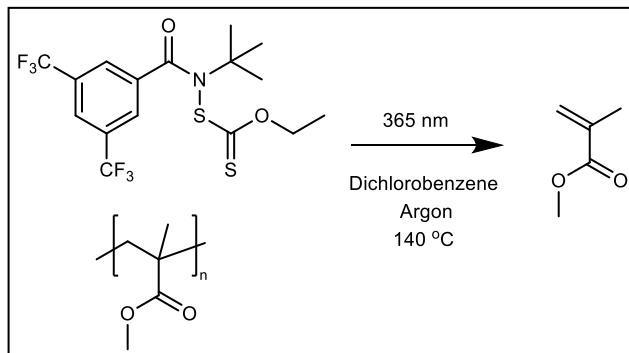

**Figure S5: Reaction scheme for PMMA depolymerization with xanthylation catalyst.**

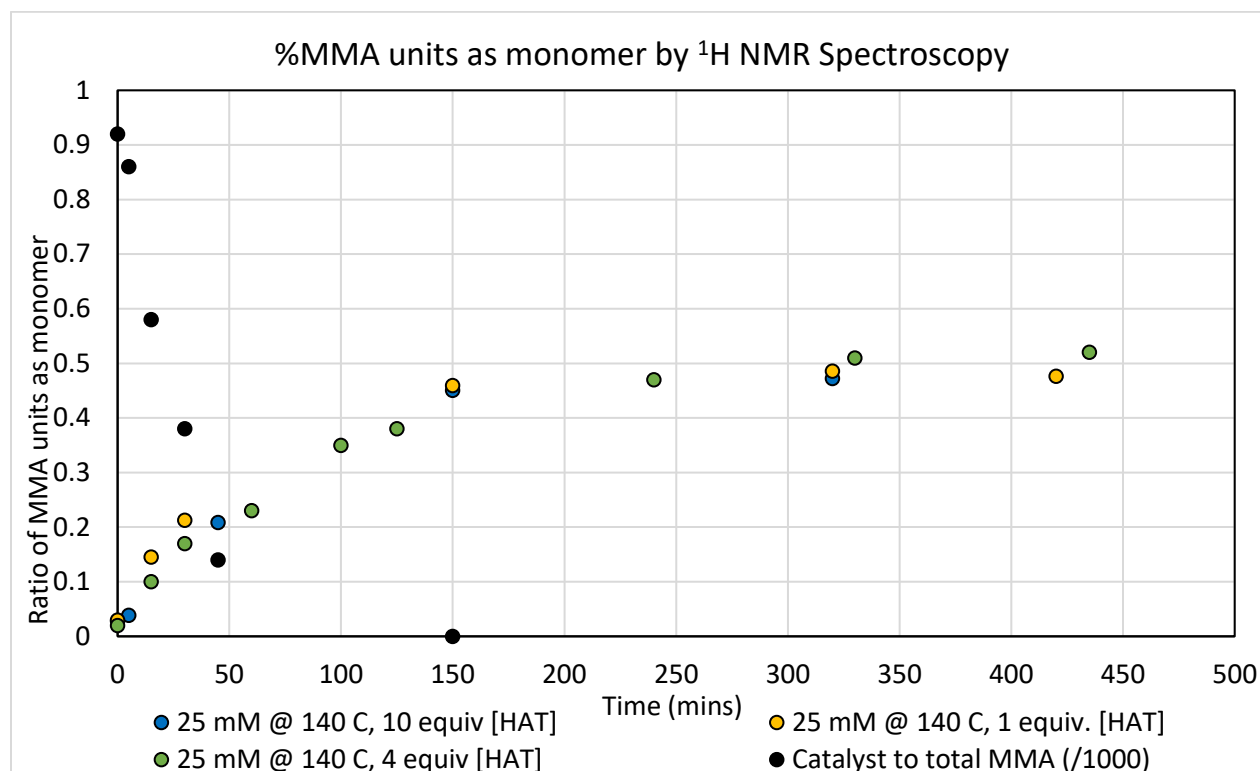

**Figure S6: Conversions for PMMA depolymerization with xanthylation catalyst versus catalyst equivalents.** Conversion of PMMA to monomer measured by  $^1\text{H}$  NMR spectroscopy varying xanthylation catalyst loadings (10 equiv. blue, 4 equiv. green, 1 equiv. yellow), and catalyst to MMA ratio (black), showing no effect of xanthylation catalyst.

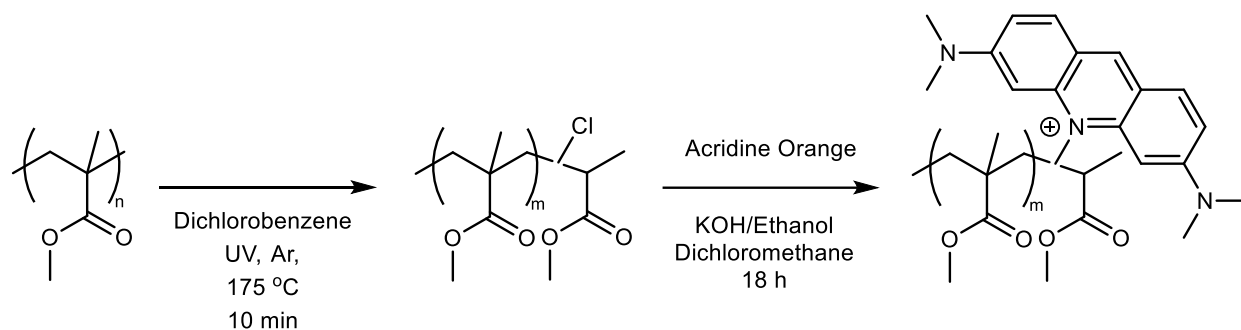

**Figure S7: Reaction scheme for two-step method for acridine functionalization with initial PMMA depolymerization in dichlorobenzene.**

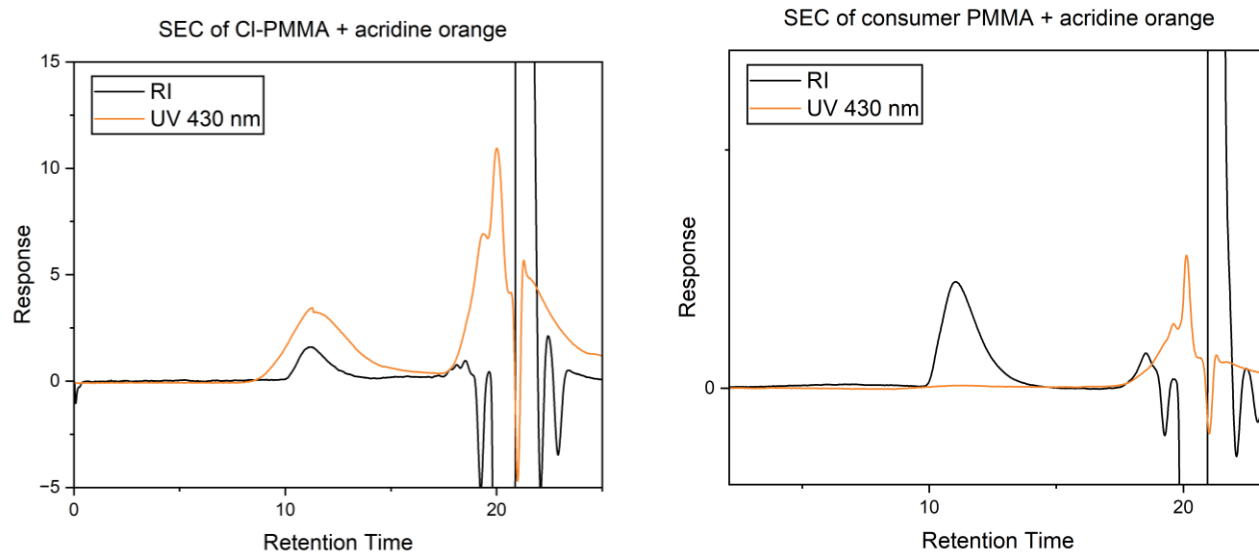

**Figure S8 and 9. SEC chromatograms showing reaction of Cl-PMMA with acridine orange.** SEC (THF) chromatograms for Cl-PMMA reacted with acridine orange (left) and consumer PMMA reacted with acridine orange (right), showing dramatic increase in 430 nm absorption (orange) corresponding to polymer RI response (black) in the Cl-PMMA polymer versus the consumer PMMA (right).

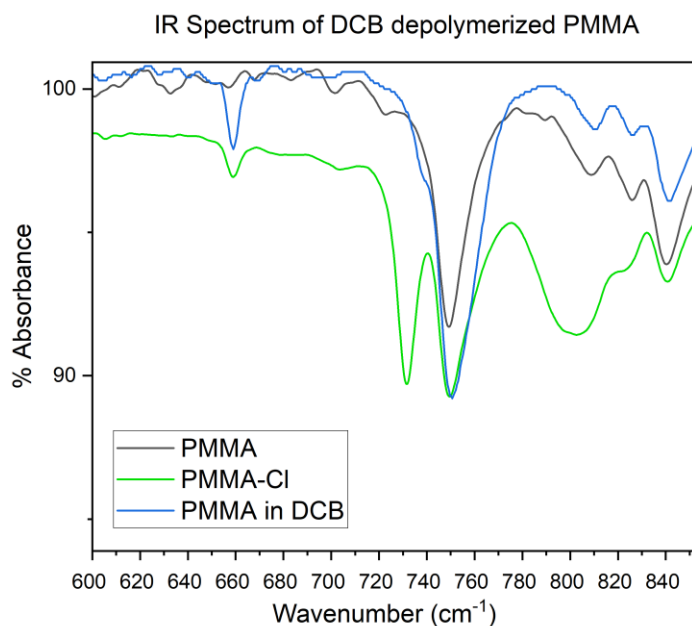

**Figure S10. FT-IR showing potential PMMA-Cl absorbance.** FT-IR spectrum of 200 kDa PMMA left for 1 hour under DCB depolymerization conditions (green) versus 200 kDa PMMA (black) and PMMA in DCB (blue) controls, illustrating the new potential C-Cl absorbance at 725 nm.

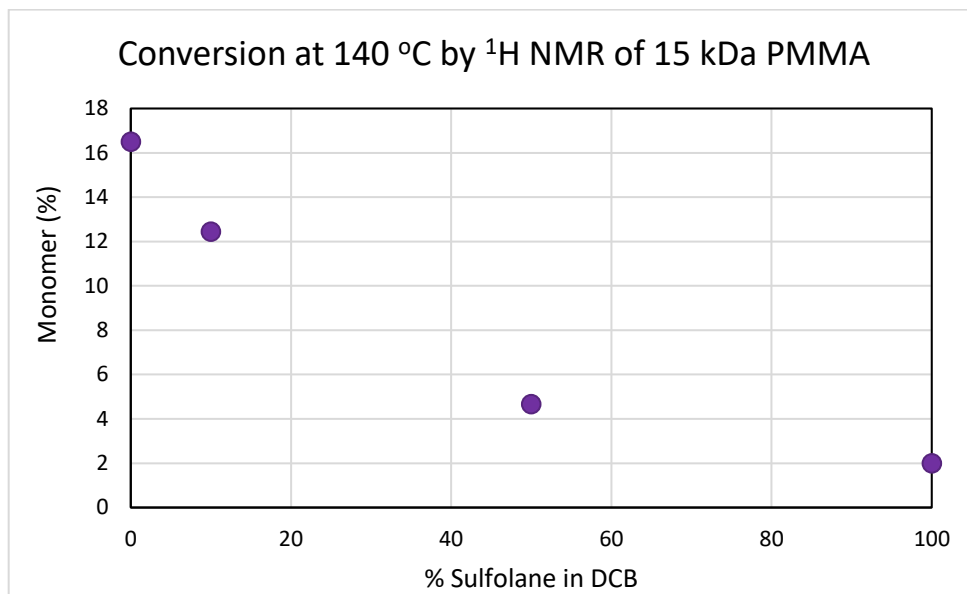

**Fig S11. Depolymerization conversion versus titration of sulfolane with dichlorobenzene**

Measured monomer produced by  $^1\text{H}$  NMR at different sulfolane DCB mixtures, showing reduction in conversion at increasing sulfolane concentrations. Reaction conducted with UV at 140 °C, 15 kDa PMMA, 4 hours. Results indicate that small additions of sulfolane to DCB decrease conversion more than a linear relationship, suggesting sulfonate-induced quenching of the depropagation is occurring.

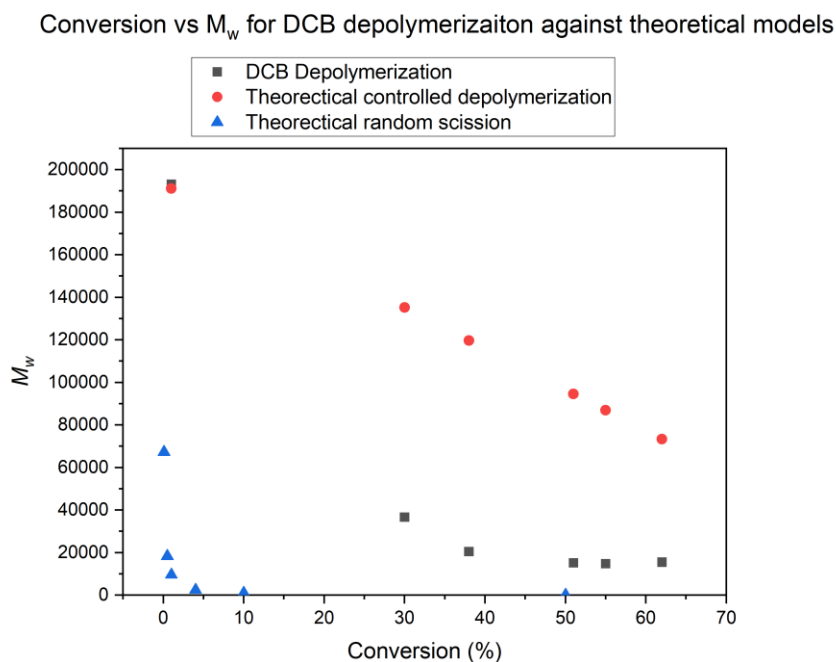

**Fig S12. Conversion vs  $M_w$  for DCB PMMA depolymerization against theoretical depolymerizations.** Measured monomer by  $^1\text{H}$  NMR spectroscopy for depolymerization in DCB at 175°C, with 200 kDa PMMA (black squares), versus theoretical conversions for random scission (blue triangles) and an end chain controlled radical depolymerization (red circles).

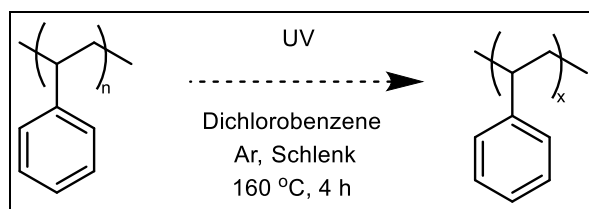

**Figure S13: Reaction scheme for the attempted depolymerization of polystyrene**

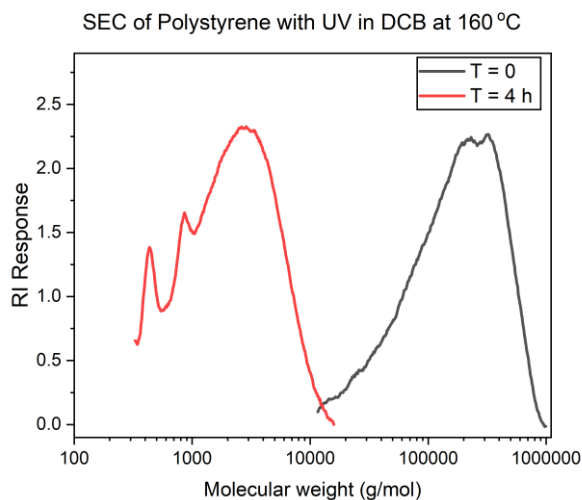

**Figure S14: SEC of attempted polystyrene depolymerization.** SEC (THF) chromatogram, showing reduced  $M_w$  in polystyrene subjected to depolymerization conditions (red, 160 °C, 4 hours, dichlorobenzene), versus initial polystyrene (black), calibrated to polystyrene standards.

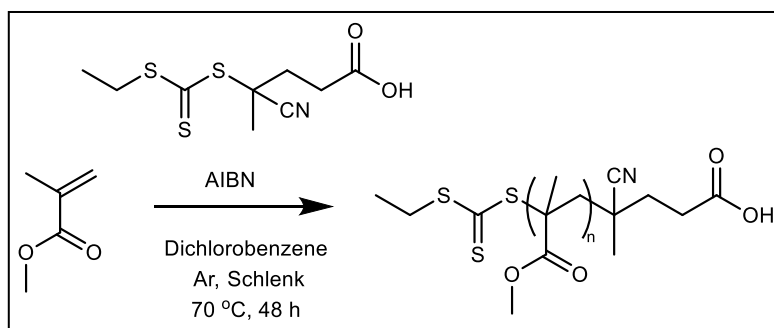

**Figure S15: Reaction scheme of MMA RAFT polymerization targeting 15 kDa.**

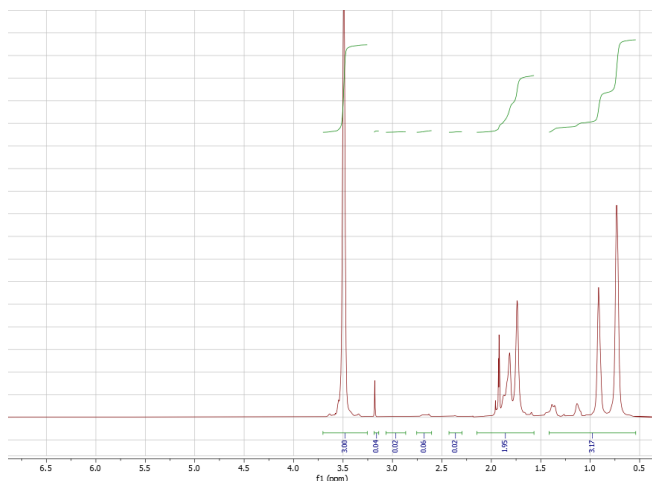

**Figure S16.  $^1\text{H}$  NMR of RAFT 15 kDa PMMA post-precipitation.**  $^1\text{H}$  NMR of RAFT 15 kDa PMMA post-precipitation ( $d_6$ -acetone, 500 MHz)

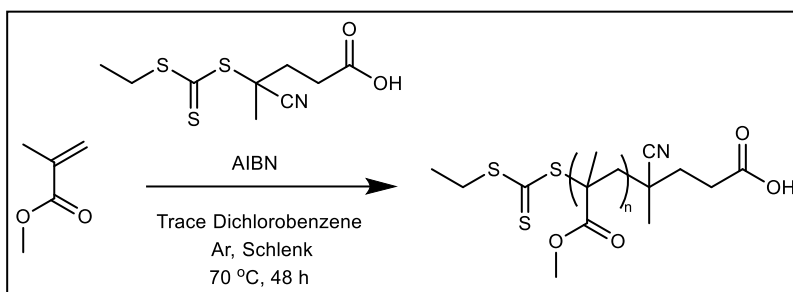

**Figure S17: Reaction scheme of recycled MMA (rMMA) RAFT polymerization targeting 15 kDa.**



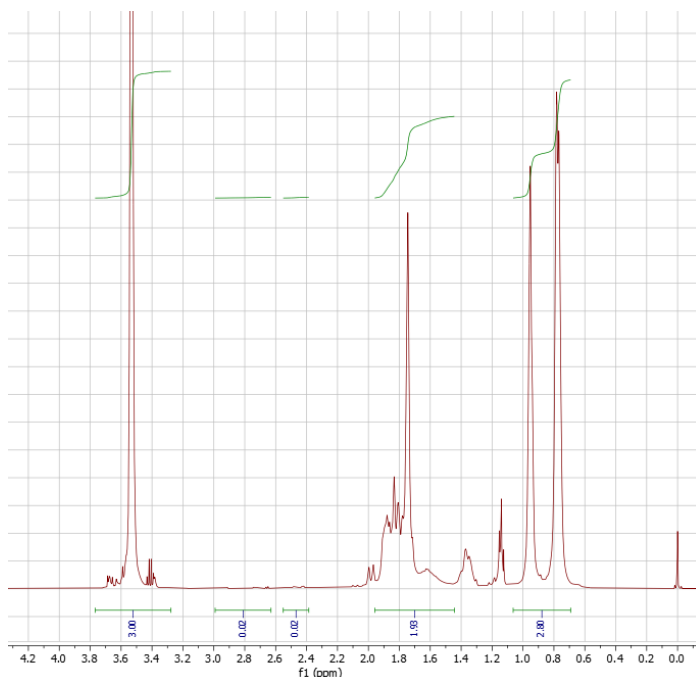

**Figure S18.  $^1\text{H}$  NMR of RAFT 15 kDa rPMMA.**  $^1\text{H}$  NMR of RAFT 15 kDa rPMMA post-precipitation ( $d_6$ -acetone, 500 MHz)

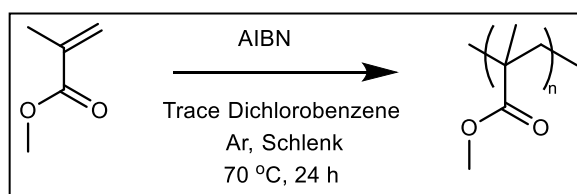

**Figure S19: Reaction scheme for uncontrolled rMMA polymerization.**

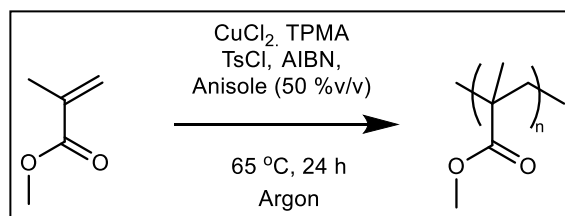

**Figure S20: Reaction scheme for ATRP polymerization of MMA**

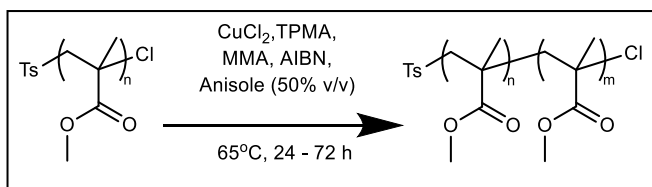

**Figure S21: Reaction scheme for ATRP chain extension of ATRP macroinitiator with MMA.**

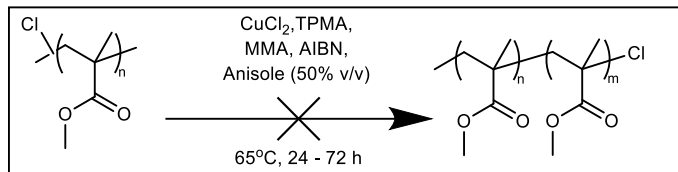

**Figure S22: Reaction scheme for attempted ATRP chain extension of depolymerized PMMA, with MMA.**

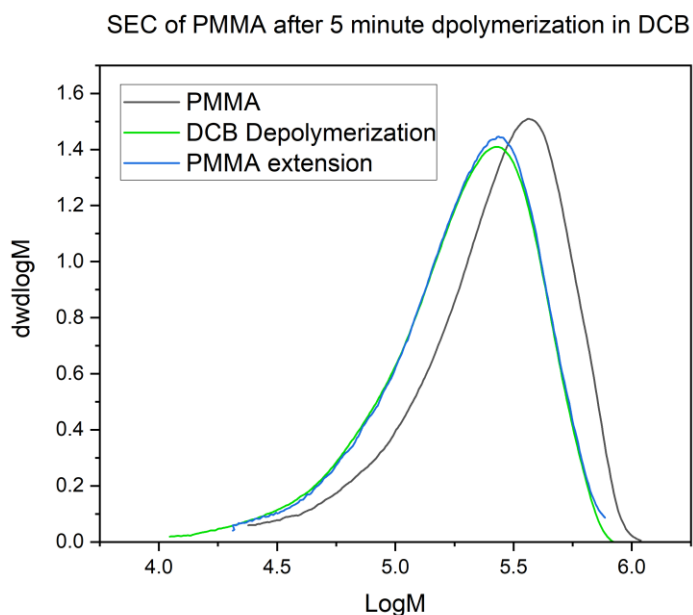

**Figure S23: SEC for the failed ATRP chain extension of Cl-PMMA polymer.** SEC (THF) of PMMA before and after 5 minutes of UV irradiation in DCB (green), showing decrease in LogM, and subsequent failed attempt at ATRP chain extension (blue).

## Figures of SEC analyses of PMMA polymers

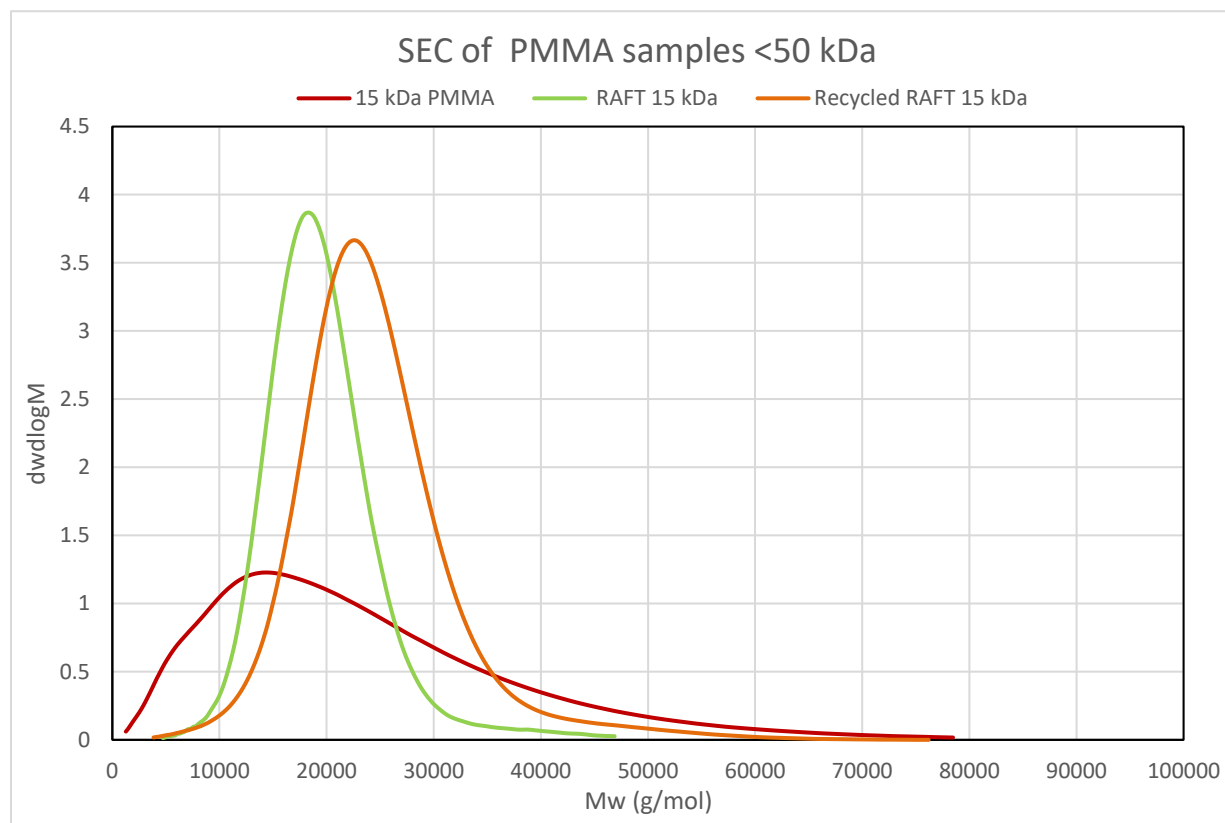

**Figure S24: SEC analyses of PMMA polymers <50 kDa.** SEC (THF) traces for polymers in this study with an  $M_n$  below 50 kDa (red - 15 kDa PMMA, green – RAFT 15 kDa PMMA, orange – recycled RAFT PMMA).

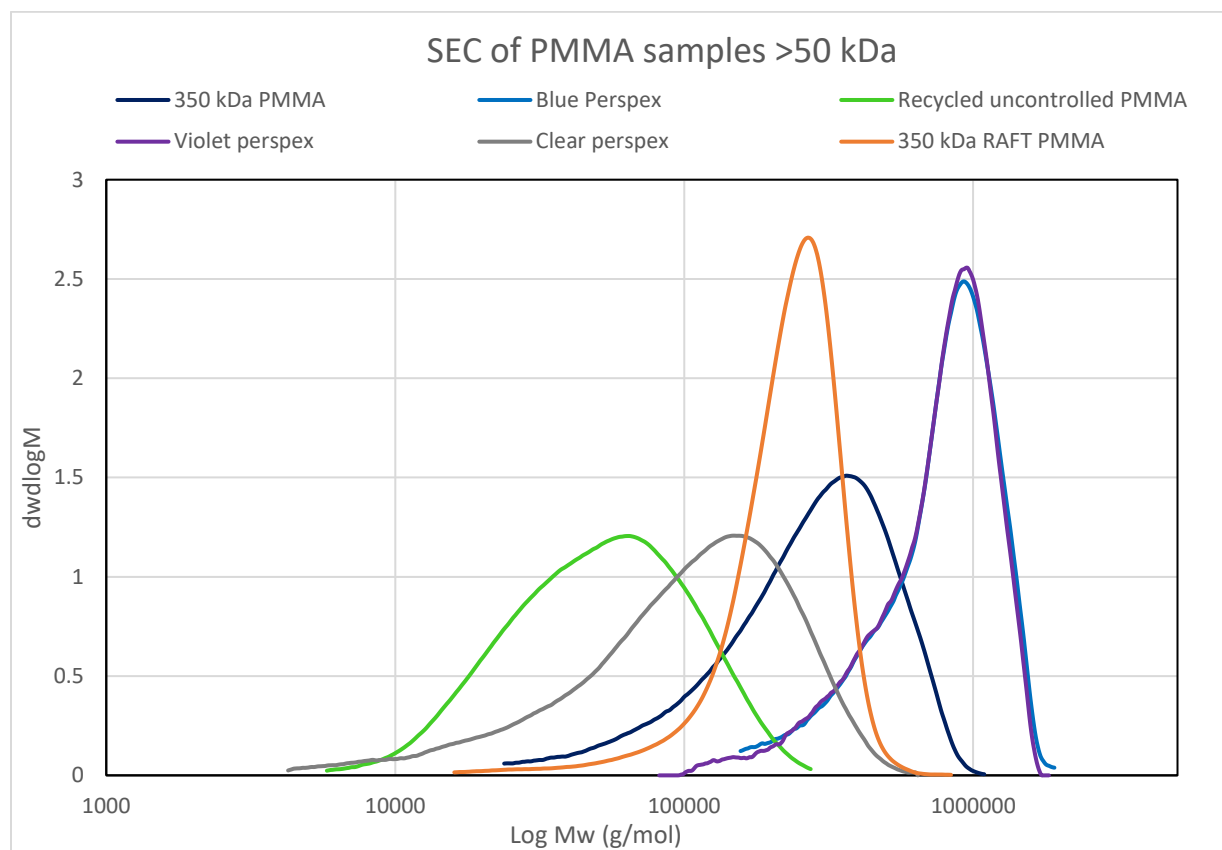

**Figure S25: SEC analyses of PMMA polymers >50 kDa.** SEC (THF) traces for polymers in this study with an  $M_n$  above 50 kDa (black – 350 kDa, blue – blue Perspex<sup>®</sup>, purple – violet Perspex<sup>®</sup>, grey – grey Perspex<sup>®</sup>, orange – 350 kDa RAFT PMMA, green – recycled uncontrolled PMMA).

### Wavelength versus conversion

**Table S1:** Conversions (%) to monomer for different wavelengths of irradiation in DCB and benzonitrile at 50 mM, 140°C and 5 h.

| Conversion (%) | 365 nm | 405 nm |
|----------------|--------|--------|
| DCB            | 49     | 48     |
| Benzonitrile   | 36     | 29     |

## Measurement of Critical Temperature ( $T_c$ ) in different solvents

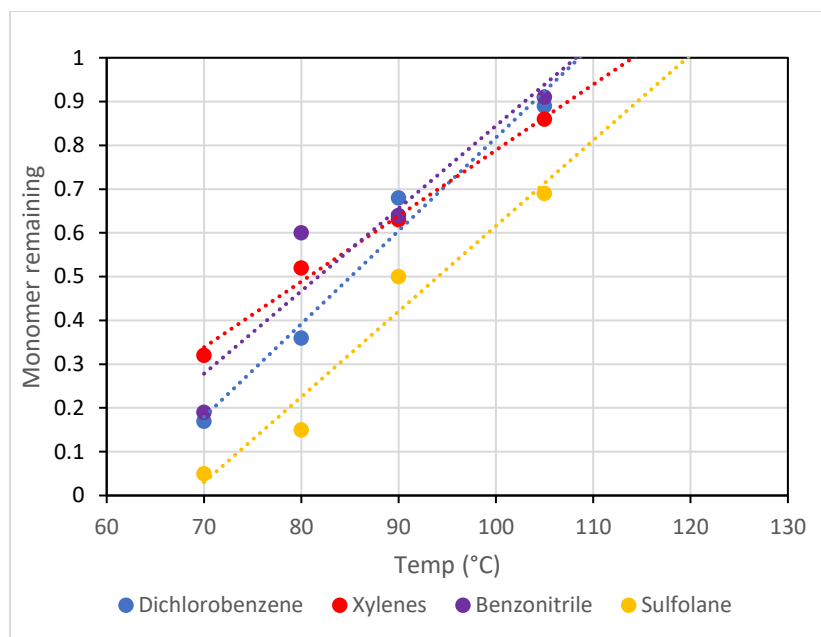

**Figure S26. Plot of temperature versus  $[M]_{eq}$  for PMMA polymerization in various solvents.** Measured monomer remaining by  $^1\text{H}$  NMR at equilibrium conversion at different temperatures (blue – dichlorobenzene, red – xylenes, purple – benzonitrile, yellow – sulfolane). Initial monomer concentration:  $[M]_0 = 0.2 \text{ M}$ . Catalyst (AIBN) concentration: 1 mol %. Reaction time > 24 hours.

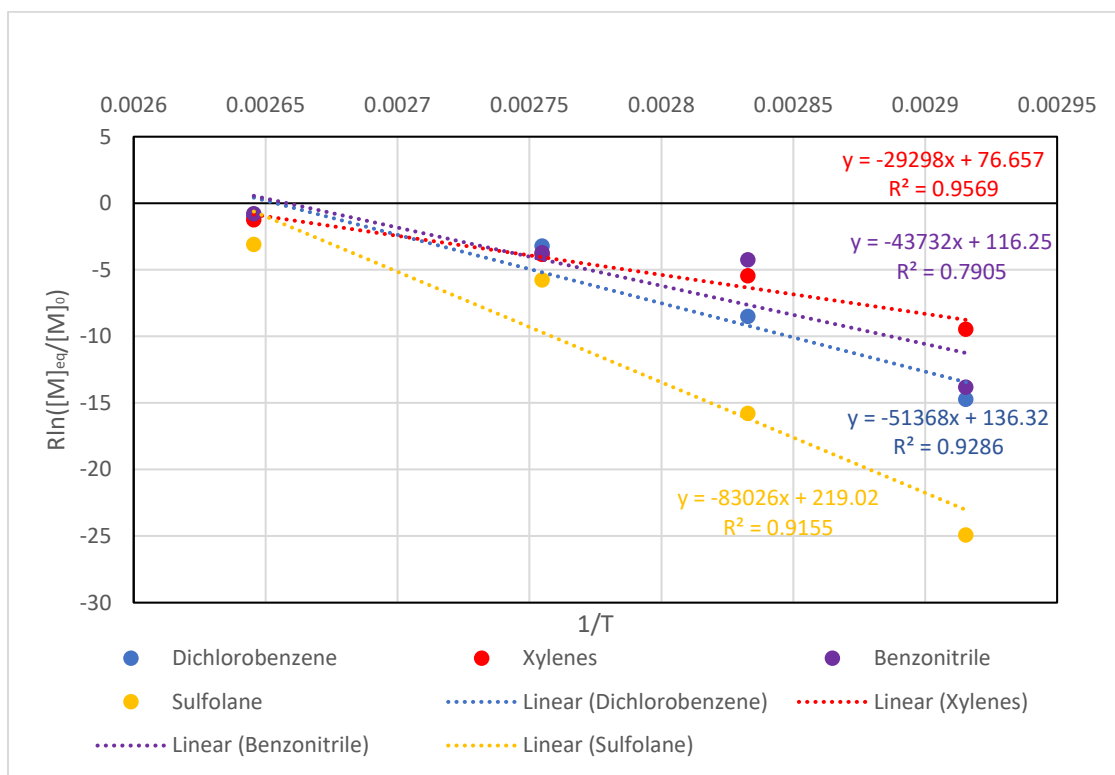

**Figure S27. Plot of Theoretical equilibrium behavior  $\ln([M]_{eq}/[M]_0)$  as a function of temperature in selected solvents.** Using  $[M]_0$  and measured  $[M]_{eq}$ ,  $\ln([M]_{eq}/[M]_0)$  was plotted against  $1/T$  (blue – dichlorobenzene, red – xylenes, purple – benzonitrile, yellow – sulfolane) to allow calculation of  $dH$ ,  $dS$  and therefore  $T_c$  by equation (1) and (2).

| Solvent         | dH     | dS    | $T_c$ (K) | $T_c$ (°C) | $R^2$ |
|-----------------|--------|-------|-----------|------------|-------|
| Dichlorobenzene | -51368 | -136  | 377.7059  | 104.7059   | 0.93  |
| Xylenes         | -29298 | -76.7 | 381.9817  | 108.9817   | 0.96  |
| Benzonitrile    | -43732 | -116  | 377       | 104        | 0.79  |
| Sulfolane       | -83026 | -219  | 379.1142  | 106.1142   | 0.92  |

**Table S2.** Thermodynamic parameters derived from  $\ln([M]_{eq}/[M]_0)$  as a function of temperature plot, including  $T_c$ , using equations (1) and (2).

$$\text{Equation (1): } R\ln\left(\frac{[M]_{eq}}{[M]_0}\right) = \frac{1}{T} * \Delta H_p - \Delta S_p \quad \text{Equation (2): } T_c = \frac{\Delta H_p}{\Delta S_p}$$

## Proposed mechanism

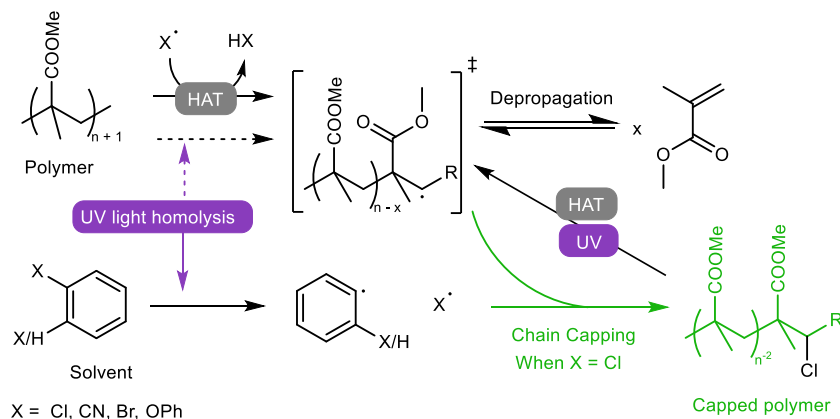

**Figure S28. Scheme for the early-stage mechanistic theory for observations of the depolymerization.** UV light causes homolysis and radical formation on the aromatic solvent.

The dashed line represents PMMA homolysis which has not been ruled out. The solvent homolysis process produces a species capable of hydrogen atom transfer from the polymer backbone. The radical polymer species then undergoes either termination through reaction when high concentrations of solvent radicals are present (e.g. by Cl in DCB) or uncontrolled depolymerization releasing monomer (e.g. in benzonitrile). The Cl-capped polymer can then undergo re-initiation with UV or HAT.

## UV-Vis spectrometry of PMMA polymers

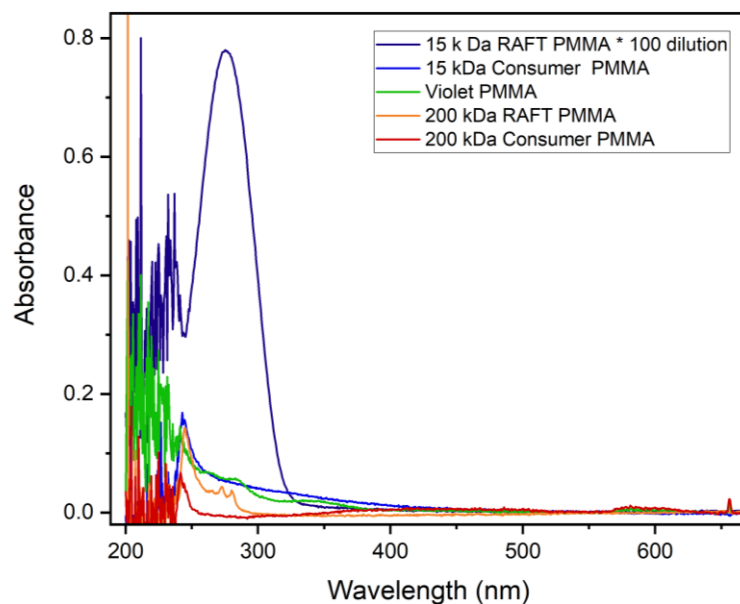

**Figure S29: UV-Vis spectrometry of PMMA polymers.** UV-Vis spectrometry of PMMA polymers in chloroform at 5mg/ml (excluding 15 kDa RAFT PMMA). No CTA absorbance is observed for the 15 kDa or 200 kDa consumer PMMA. The absorbance in violet Perspex® is attributed to dyes and additives in the plastic (red – 200 kDa PMMA, orange – 200 kDa RAFT PMMA, green – violet Perspex®, blue – 15 kDa PMMA, and navy – 15 kDa RAFT PMMA at 0.05 mg/mL).

## Tables of conversions measured by <sup>1</sup>H NMR spectroscopy (Method 1)

**Table S3: Investigating temperature and concentration relationships**

| <i>Solvent</i>                                    | DCB     | DCB    | DCB    | DCB    | DCB     | DCB    | DCB    | DCB    | DCB     | DCB    | DCB    | DCB    | DCB    | DCB     | DCB    | DCB    | DCB     | DCB     | DCB    | DCB    | DCB     |
|---------------------------------------------------|---------|--------|--------|--------|---------|--------|--------|--------|---------|--------|--------|--------|--------|---------|--------|--------|---------|---------|--------|--------|---------|
| <i>Monomer mg/mL</i>                              | 1.01    | 1.01   | 1.717  | 1.717  | 2.525   | 2.525  | 2.525  | 2.525  | 2.525   | 5.05   | 10.1   | 10.1   | 15.15  | 15.15   | 30.3   | 40.4   | 40.4    | 101     | 101    | 202    | 202     |
| PMMA                                              | 300 kDa | 15 kDa | 15 kDa | 15 kDa | 300 kDa | 15 kDa | 15 kDa | 15 kDa | 300 kDa | 15 kDa | 15 kDa | 15 kDa | 15 kDa | 300 kDa | 15 kDa | 15 kDa | 300 kDa | 300 kDa | 15 kDa | 15 kDa | 300 kDa |
| Molarity (mM)                                     | 10      | 10     | 17     | 17     | 25      | 25     | 25     | 25     | 25      | 50     | 100    | 100    | 150    | 150     | 300    | 400    | 400     | 1000    | 1000   | 2000   | 2000    |
| Temp                                              | 175     | 175    | 140    | 150    | 140     | 175    | 175    | 175    | 175     | 175    | 175    | 175    | 175    | 175     | 175    | 175    | 175     | 175     | 175    | 175    | 175     |
| Time (min)                                        | 300     | 300    | 300    | 300    | 300     | 300    | 300    | 300    | 300     | 300    | 300    | 300    | 300    | 300     | 300    | 300    | 300     | 300     | 300    | 300    | 300     |
| ∫ Monomer <sub>Vinyl</sub>                        | 1       | 1      | 1      | 0.26   | 1       | 1      | 1      | 1      | 1       | 1      | 1      | 1      | 1      | 1       | 1      | 1      | 1       | 1       | 1      | 1      | 1       |
| ∫ Polymer <sub>OMe</sub> + Monomer <sub>OMe</sub> | 4.22    | 7.2    | 17.8   | 2.64   | 5.79    | 5.6    | 6.4    | 5.3    | 4.19    | 5.7    | 10.8   | 7.3    | 9.5    | 4.68    | 13.3   | 13.8   | 5.05    | 5.09    | 17.4   | 28.8   | 16.3    |
| % Monomer                                         | 71.1    | 41.7   | 16.9   | 29.5   | 51.8    | 53.6   | 46.9   | 56.6   | 71.6    | 52.6   | 27.8   | 41.1   | 31.6   | 64.1    | 22.6   | 21.7   | 59.4    | 58.9    | 17.2   | 10.4   | 18.4    |

**Table S4: Investigating Solvent -pt 1**

| <i>Solvent</i>                                    | Cyrene | Sulfolane | Xylenes | Cyrene | Sulfolane | DCB    | Xylenes | Diphenyether | Diphenyether | Mesitylene | Ditertbutyl-phenol | Trichloro-benzene | Trichloro-benzene | Benzonitrile | Benzonitrile |
|---------------------------------------------------|--------|-----------|---------|--------|-----------|--------|---------|--------------|--------------|------------|--------------------|-------------------|-------------------|--------------|--------------|
| PMMA                                              | 15 kDa | 15 kDa    | 15 kDa  | 15 kDa | 15 kDa    | 15 kDa | 15 kDa  | 15 kDa       | 15 kDa       | 15 kDa     | 15 kDa             | 15 kDa            | 15 kDa            | 15 kDa       | 15 kDa       |
| Molarity (mM)                                     | 25     | 25        | 25      | 25     | 25        | 25     | 25      | 35           | 35           | 25         | 25                 | 25                | 25                | 25           | 25           |
| Temp                                              | 175    | 175       | 140     | 175    | 175       | 175    | 140     | 175          | 140          | 175        | 175                | 140               | 175               | 140          | 175          |
| Time (min)                                        | 300    | 300       | 300     | 300    | 300       | 300    | 300     | 300          | 300          | 300        | 300                | 300               | 300               | 300          | 300          |
| ∫ Monomer <sub>Vinyl</sub>                        | 1      | 1         | 1       | 1      | 1         | 1      | 1       | 1            | 1            | 1          | 1                  | 1                 | 1                 | 1            | 1            |
| ∫ Polymer <sub>OMe</sub> + Monomer <sub>OMe</sub> | 45.6   | Neg.      | 32.1    | 45.6   | Neg.      | 5.3    | 32.1    | 6.4          | 47           | Neg.       | 56                 | 19.1              | 7.6               | 63           | 10.7         |
| % Monomer                                         | 6.6    | Neg.      | 9.3     | 6.6    | Neg.      | 56.6   | 9.3     | 46.9         | 6.4          | Neg.       | 1.8                | 15.7              | 39.5              | 4.8          | 28.0         |



**Table S4: Investigating Solvent -pt 2**

| <i>Solvent</i>                                            | NMP    | Diphenylether | Dibromo-<br>benzene | Sulfolane | NMP       | Dibromo-<br>benzene | NMP    | Sulfolane | Methyl<br>levullinate | p-<br>Cymene | Vanilylalcohol | 10% Sulfolane<br>in DCB | 50% Sulfolane<br>in DCB |
|-----------------------------------------------------------|--------|---------------|---------------------|-----------|-----------|---------------------|--------|-----------|-----------------------|--------------|----------------|-------------------------|-------------------------|
| PMMA                                                      | 15 kDa | 15 kDa        | 15 kDa              | 15 kDa    | 15<br>kDa | 15 kDa              | 15 kDa | 15 kDa    | 15 kDa                | 15 kDa       | 15 kDa         | 15 kDa                  | 15 kDa                  |
| Molarity (mM)                                             | 25     | 1000          | 25                  | 25        | 25        | 25                  | 25     | 25        | 25                    | 25           | 25             | 25                      | 25                      |
| Temp                                                      | 175    | 175           | 175                 | 175       | 175       | 140                 | 140    | 140       | 140                   | 160          | 160            | 140                     | 140                     |
| Time (min)                                                | 300    | 1080          | 300                 | 300       |           | 300                 | 300    | 300       | 300                   | 300          | 300            | 300                     | 300                     |
| $\int$ Monomer <sub>Vinyl</sub>                           | 1      | 1             | 1                   | 1         | 1         | Neg                 | Neg    | Neg       | Neg                   | 1            | Neg            | 1                       | 1                       |
| $\int$ Polymer <sub>OMe</sub> +<br>Monomer <sub>OMe</sub> | 47     | 33            | 9.4                 | 69        | 291       | Neg                 | Neg    | Neg       | Neg                   | 46           | Neg            | 24.1                    | 64.4                    |
| % Monomer                                                 | 6.4    | 9.1           | 31.9                | 4.3       | 1.0       | Neg                 | Neg    | Neg       | Neg                   | 6.5          | Neg            | 12.4                    | 4.7                     |

**Investigating PMMA type**

| <i>Solvent</i>                                         | DCB     | DCB                    | DCB        | DCB    | DCB    | DCB        | DCB              | DCB             | DCB               | DCB               | DCB             | DCB              | DCB               | DCB               |
|--------------------------------------------------------|---------|------------------------|------------|--------|--------|------------|------------------|-----------------|-------------------|-------------------|-----------------|------------------|-------------------|-------------------|
| <i>Additional Variable</i>                             | None    | No UV                  | No UV      | None   | No UV  | None       | None             | None            | None              | None              | None            | None             | None              | None              |
| <i>Monomer mg/mL</i>                                   | 2.525   | 2.525                  | 2.525      | 202    | 2.525  | 202        | 2.525            | 2.525           | 2.525             | 101               | 101             | 101              | 50.5              | 50.5              |
| <i>PMMA</i>                                            | 300 kDa | RAFT<br>PMMA<br>15 kDa | 300<br>kDa | 15 kDa | 15 kDa | 300<br>kDa | Clear<br>Perspex | Blue<br>Perspex | Violet<br>Perspex | Violet<br>Perspex | Blue<br>Perspex | Clear<br>Perspex | Violet<br>Perspex | Violet<br>Perspex |
| <i>Molarity (mM)</i>                                   | 25      | 25                     | 25         | 2000   | 25     | 2000       | 25               | 25              | 25                | 1000              | 1000            | 1000             | 500               | 500               |
| <i>Temp</i>                                            | 175     | 175                    | 175        | 175    | 175    | 175        | 175              | 175             | 175               | 175               | 175             | 175              | 175               | 175               |
| <i>Time (min)</i>                                      | 300     | 300                    | 300        | 300    | 300    | 300        | 300              | 300             | 300               | 300               | 300             | 300              | 1080              | 1080              |
| $\int$ Monomer <sub>Vinyl</sub>                        | 1       | 1                      | 1          | 1      | 1      | 1          | 1                | 1               | 1                 | 1                 | 1               | 1                | 1                 | 1                 |
| $\int$ Polymer <sub>OMe</sub> + Monomer <sub>OMe</sub> | 4.19    | 4.89                   | Neg        | 28.8   | Neg    | 16.3       | 5.65             | 7.26            | 4.4               | 4.38              | 13.55           | 6.57             | 4.65              | 5.44              |
| % Monomer                                              | 71.6    | 61.4                   | Neg        | 10.4   | Neg    | 18.4       | 53.1             | 41.3            | 68.2              | 68.5              | 22.1            | 45.7             | 64.5              | 55.2              |
